# Supplementary material for: Quality Assessment of Banana Ripening Stages by Combining Analytical Methods and Image Analysis
Source: MDPI journal article supplement (doi:10.3390/app13063533), 2023-03-10
Supplement: s1 [file s1]

**Table S1.** Image analysis computed color parameters ( $L^*$ ,  $a^*$ ,  $b^*$ ) of banana peel samples, at days 2, 4, 7, 9, 11, 14, 17, 21 of storage.

| Days | $L^*$                  | $a^*$                | $b^*$                |
|------|------------------------|----------------------|----------------------|
| 2    | $65.206 \pm 6.193^a$   | $-2.760 \pm 1.216^a$ | $8.016 \pm 3.699^a$  |
| 4    | $70.199 \pm 4.795^b$   | $-1.001 \pm 0.541^b$ | $2.787 \pm 1.522^b$  |
| 7    | $62.747 \pm 5.134^c$   | $-0.219 \pm 0.524^c$ | $0.630 \pm 1.411^c$  |
| 9    | $60.192 \pm 6.74^{cd}$ | $0.852 \pm 0.787^d$  | $-2.181 \pm 2.019^d$ |
| 11   | $59.489 \pm 5.487^d$   | $0.572 \pm 0.670^d$  | $-1.439 \pm 1.739^d$ |
| 14   | $55.500 \pm 7.030^e$   | $1.972 \pm 0.834^e$  | $-5.024 \pm 2.060^e$ |
| 17   | $50.658 \pm 8.014^f$   | $2.459 \pm 1.005^f$  | $-6.241 \pm 2.430^f$ |
| 21   | $37.216 \pm 9.446^g$   | $2.957 \pm 0.714^g$  | $-7.403 \pm 1.719^g$ |

\*Results represent feature mean value  $\pm$  standard deviation ( $n = 8$ ); a-g: Different letters after each value in the same column indicate statistically significant differences ( $P < 0.05$ ) according to Wilcoxon test.

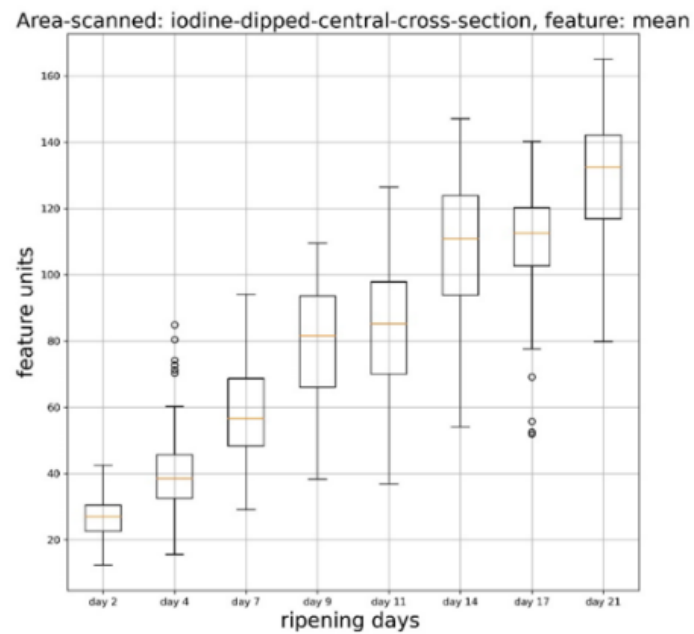

**Figure S1.** Variation of feature mean value of all grayscale image pixels intensities of banana flesh slices after iodine test, at days 2, 4, 7, 9, 11, 14, 17, 21 of storage.

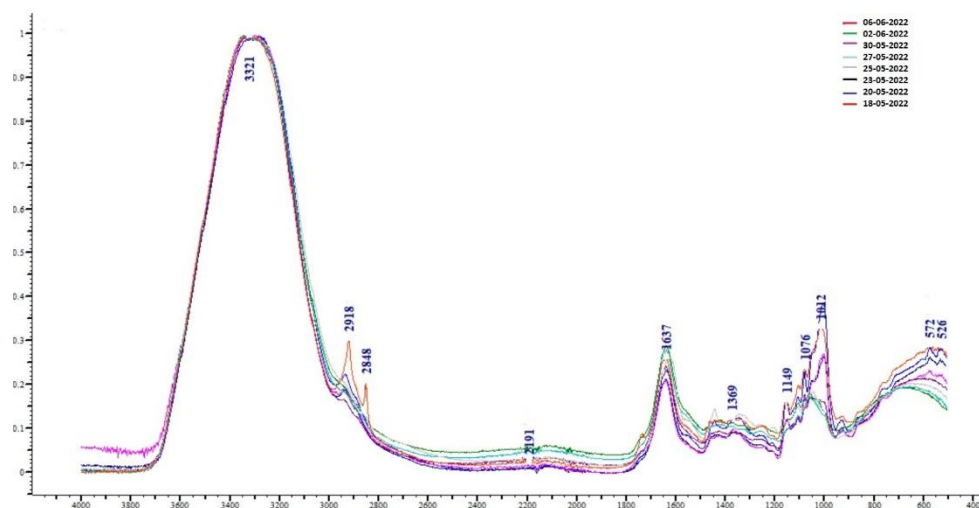

**Figure S2.** Overlay of ATR-FTIR spectra, acquired from 4000 to 499  $\text{cm}^{-1}$  of banana flesh at days 2 (18-05-2022), 4 (20-05-2022), 7 (23-05-2022), 9 (25-05-2022), 11 (27-05-2022), 14 (30-05-2022), 17 (02-06-2022), 21 (06-06-2022) of storage.
